# Supplementary material for: Identification and Functional Analysis of a Lysozyme Gene from Coridius chinensis (Hemiptera: Dinidoridae)
Source: MDPI journal article supplement (doi:10.3390/biology10040330), 2021-04-14
Supplement: s1 [file s1]

M G S S H H H H H H S S G L V P ↓ R G S H M

ATGGGCAGCAGCCATCATCATCATCACAGCAGCGCCTGGTGCCGCGCGGCAGCCATATG

|              |                                                                                         |
|--------------|-----------------------------------------------------------------------------------------|
| Protein      | K T Y E A C E L A R E L V D K G A A M D Q V G T W V C I A K                             |
| Original 1   | AAGACTTACGAGGCTGCGAGCTCGCCGGAGCTGGTGGACAAGGGGCGCGATGGACCAGGTGGGCACCTGGGTCTGCATCGCCAAG   |
| Optimized    | AAGACTATGAAGCCTGTGAAGTGGCAGTGAAGTGGTAAAGGCGCAGCATGGATCAGGTGGTACCTGGGTGGTATGGCAAA        |
| Protein      | Y E S D F N T S A V G R L N G D G S A D H G I F Q I S D R Y                             |
| Original 91  | TACGAGTCCGACTTCAACACCTCCGCCGTGGGAGGTGAACGGGACGGCAGCGCCAGCAGGCATCTTCCAGATCAGCGACCGCTAC   |
| Optimized    | TATGAAGCGATTTCACACCAAGCGCGTGGCCGCTGAATGGCGATGGTACCGCAGATCATGGTATTTTCAGATTAGCGATCGCTAT   |
| Protein      | W C S P Q G W A C N I P C D L L E D D D I S D D W K C A K R                             |
| Original 181 | TGGTGCTCCCCAGGATGGGCTGCAACATACCTGCGACCTCTGGAGGACGACGACATCTCCGACGACTGGAAGTGCGCCAAGAGG    |
| Optimized    | TGGTGAGTCCGCGAGGTGGGCGATTAATATCCGTGCGATCTGCTGGAAGATGATGATATTAGCGATGATTGGAAATGTGCAAAACGC |
| Protein      | I F R Q H K V L S G N G F R A W A V Y S S R C S G D N S G Y                             |
| Original 271 | ATATTCAGGCAGCAAGGTCCTCAGCGGAATGGGTTACGGGCTGGGCGGTCTACTCCTCCAGGTGCTCGGGTGATAACAGTGGCTAT  |
| Optimized    | ATTTTCGTCAGCATAAAGTCTGAGCGCAATGGCTTCGCGCATGGGCGTTTATAGCAGTCGCTGAGTGGCGATAATAGCGGTTAT    |
| Protein      | V E G C F D S K A S V S Q S N T T V I T L P A F T T S T T T                             |
| Original 361 | GTGAAGGTGTTTTGACAGTAAGGCTTCTGTTTCACAGTCCAACACCACAGTCATTACACTGCCTGCCTTCAAACTTCGACCACCACA |
| Optimized    | GTGAAGGTGCTTTGATAGCAAAGCAAGTGTAGCCAGAGCAATACCACCGTGATTACCTGCCGCGCCTTTACCACCACTACCACCACC |
| Protein      | S T S T T T E E P E R V E G S L S A R E R N N A E K V Q V I                             |
| Original 451 | TCCACTTCTACCACAACGAAGAACCTGAGCGTGTGAAGGATCCCTTAGTGCCGAGAACGGAACAATGCAGAGAAAGTACAAGTTATA |
| Optimized    | AGCACCAGCACCACCACGAAGAACCAGCAAGTGTGAAGGCAGCCTGAGTGCAAGCGAACGCAATATGCAGAAAAAGTGCAGGTTATT |
| Protein      | D L E M M E K K G K S F V N V A S S S K K K W K P W T W E I                             |
| Original 541 | GATCTAGAAATGATGGAAGAAAGGCAAGTCATTGTAAATGTGGCATCCTCATCAAAAAAGAAATGGAACCATGGACTTGGGAGATA  |
| Optimized    | GATCTGGAATGATGGAAGAAAGGTAAAGCTTTGTAACTGGCCAGCAGCAGCAAAAAAGAAATGGAACCGTGGACTGGGAATT      |

\*

TAAGAAATTC

**Figure S1.** Optimized nucleotide and amino acid sequences of the mature CcLys2. The total length of the optimized gene is 633 bp, and red marks the mutated bases. The recognition sites for *Nde* I and *Eco*R I are underlined, and the red arrow marks the thrombin cleavage site. The N-terminal of the amino acid sequence contains a 6×His-tag. The asterisk marks the stop codon.

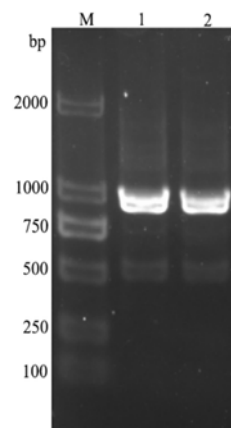

**Figure S2.** Identification of the recombinant expression vector by PCR. M: DL2000 DNA marker; Lanes 1 and 2: the *CcLys2* gene with a part of the pET-28b(+) vector sequence.

**Table S1.** Species name, protein name and GenBank accession number for multiple sequence alignment and phylogenetic analysis.

| Protein name | Species name                      | GenBank accession number |
|--------------|-----------------------------------|--------------------------|
| CcLys2       | <i>Coridius chinensis</i>         | QPB70596                 |
| CcLLP3       | <i>Coridius chinensis</i>         | MW250790                 |
| HEWL         | <i>Gallus gallus domesticus</i>   | 1LSZ_A                   |
| HLYZ1        | <i>Homo sapiens</i>               | NP_000230                |
| PsLys        | <i>Plautia stali</i>              | BBE08150                 |
| HhLys        | <i>Halyomorpha halys</i>          | KAE8573139               |
| TcLys1       | <i>Tribolium castaneum</i>        | ACV32411                 |
| TcLys2       | <i>Tribolium castaneum</i>        | ACV32412                 |
| HaLLP1       | <i>Harmonia axyridis</i>          | AIZ72680                 |
| HaLLP2       | <i>Harmonia axyridis</i>          | AIZ72679                 |
| HaLys3       | <i>Harmonia axyridis</i>          | AIZ72681                 |
| HaLys4       | <i>Harmonia axyridis</i>          | AIZ72682                 |
| AgLYSC1      | <i>Anopheles gambiae</i>          | Q17005                   |
| AgLys c-6    | <i>Anopheles gambiae</i>          | AAY21238                 |
| AgLys c-8    | <i>Anopheles gambiae</i>          | AAY21241                 |
| CqLys        | <i>Culex quinquefasciatus</i>     | XP_001843429             |
| FoLys        | <i>Frankliniella occidentalis</i> | KAE8737425               |
| NilLys       | <i>Nilaparvata lugens</i>         | AGK40894                 |
| BmLZ         | <i>Bombyx mori</i>                | NP_001037448             |
| BLLP1        | <i>Bombyx mori</i>                | ABP52099                 |
| ALLP1        | <i>Antheraea mylitta</i>          | ABP52098                 |
| CfLys3       | <i>Coptotermes formosanus</i>     | AFZ78838                 |
| SeLys3       | <i>Spodoptera exigua</i>          | AKJ54522                 |
| OfLys5       | <i>Ostrinia furnacalis</i>        | AGV28584                 |

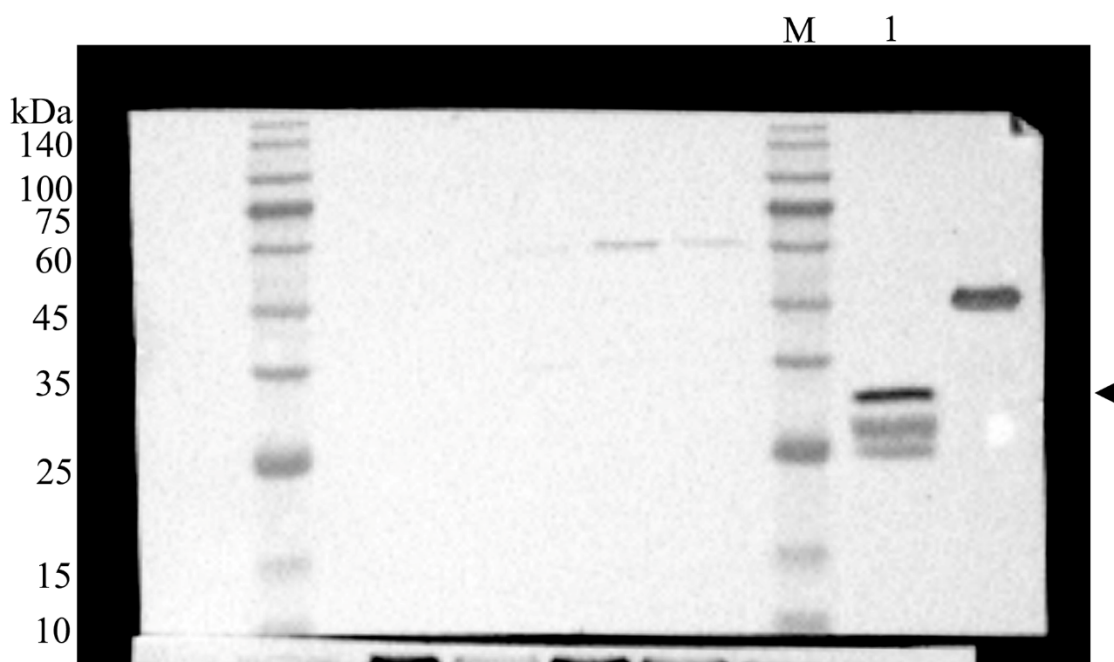

**Figure S3.** M: Protein molecular weight marker (10-140 kDa). Lane 1: blotting band of fusion CcLys2. The arrow indicates the band of fusion CcLys2.
